# Supplementary material for: Languages with more speakers tend to be harder to (machine-)learn
Source: Research Square preprint supplement (doi:10.21203/rs.3.rs-3292422/v2), 2023-10-19
Supplement: Supplementary file [file d7b3ae3cd56e0aa2a58c1198.pdf]

## Supplementary Information for

### **Languages with more speakers tend to be harder to (machine-)learn**

Alexander Koplenig, Sascha Wolfer

Correspondence to: [koplenig@ids-mannheim.de](mailto:koplenig@ids-mannheim.de)

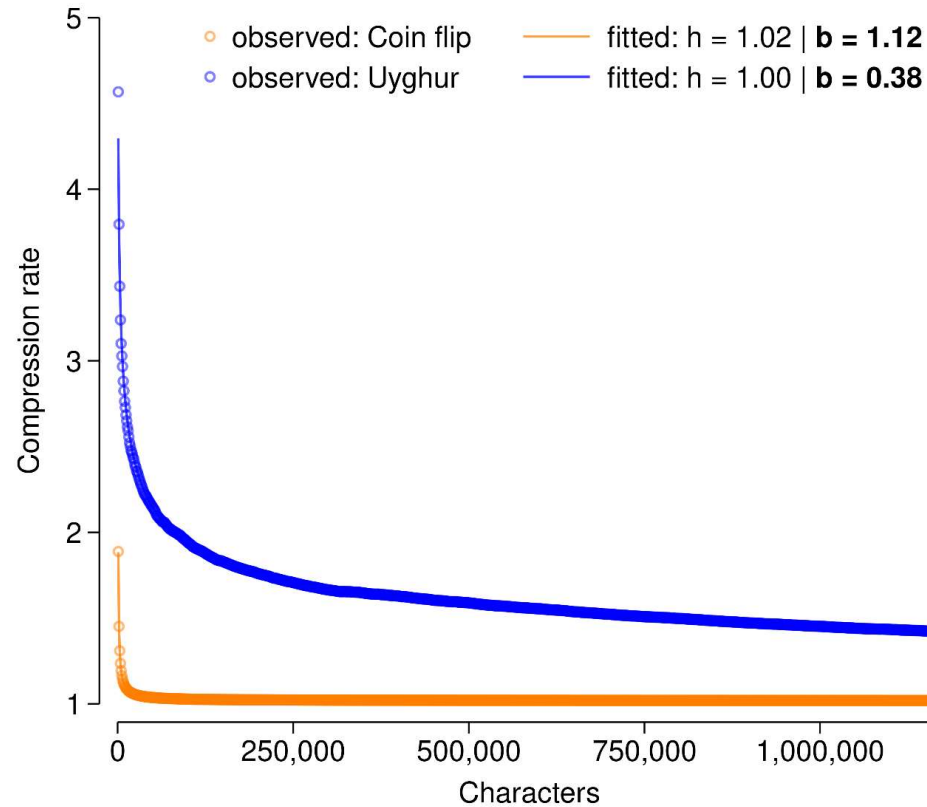

**Supplementary Figure 1** | Illustration of measuring learning difficulty in Study 1. Orange circles represent observed bits-per-symbol for a synthetic dataset for a “language” with two characters (‘a’, ‘b’) that are randomly emitted (‘Coin flip’). The underlying entropy rate is therefore  $h = \log_2(2) = 1.00$ . Orange lines represent fitted values based on the ansatz function. As can be seen, the extrapolated entropy rate is very close to the theoretical expectation. Blue circles represent observed bits-per-symbol that are needed (on average) to encode/predict symbols based on increasing amounts of training data for a real document, here a translation of the Bible into Uyghur on the level of characters (‘uig-x-bible-romanized\_parents’). The blue line represents fitted values based on the ansatz function. The extrapolated entropy rate is  $h = 1.00$ . The  $b$  parameter describes the shape of the fitted curves where higher values indicate fast convergence and thus lower learning difficulty. For the coin flip data, convergence is much faster, thus  $b = 1.12$ , whereas for the Uyghur text, the LM needs comparatively more training data and convergence to the underlying source entropy is rather slow, thus  $b = 0.38$ .

**Supplementary Table 1 | Multilevel mixed-effects linear regression results (Study 1).** Column 1: Language model. Column 2: Symbol type. Column 3: Estimated effect of speaker population size,  $\beta_{\text{LMER}}$ . Listed are models with the lowest AIC per LM and per symbol from a total of 2,430 models that include a fixed effect (and potential random slopes) for speaker population size. To control for the potential non-independence of data-points due to phylogenetic relatedness and geographical proximity, all models additionally include fixed covariates, random intercepts and random slopes. Standard errors and  $p$ -values are given in brackets. Column 4: Difference-in-AIC between reduced and full models. Reduced models do not include a fixed effect (and potential random slopes) for speaker population size. Column 5: Percentage of cases where the full model has a better fit (i.e. lower AIC) than the corresponding reduced model. Models that do not include a fixed effect for speaker population size but potential random slopes for speaker population size are excluded. Column 6: Percentage of cases where the full model has a better fit than the corresponding reduced model. Here, models, where  $\beta_{\text{LMER}}$  is constrained to be zero, are included. Column 7 – 9: selected control covariates for the model with the lowest AIC per LM and symbol.  $N = 3,853$ . Statistical significance is determined based on parametric tests. See Methods for further information on statistical methods.

| LM                   | Symbol     | $\beta_{\text{LMER}}$ (s.e., $p_{\text{para}}$ ) | $\Delta\text{AIC}$ | $M^+$  | $M_c^+$ | Selected controls                 |                                                                        |                                                  |
|----------------------|------------|--------------------------------------------------|--------------------|--------|---------|-----------------------------------|------------------------------------------------------------------------|--------------------------------------------------|
|                      |            |                                                  |                    |        |         | Fixed effects                     | Random intercepts                                                      | Random slopes                                    |
| PPM                  | words      | -0.048 (s.e. = 0.019; $p = 0.013$ )              | 58.63              | 100.00 | 99.26   | $h$ , $L$ , and their interaction | corpus, macro-area, country, language family, language                 | corpus, macro-area                               |
|                      | characters | -0.028 (s.e. = 0.011; $p = 0.016$ )              | 98.92              | 100.00 | 99.92   |                                   | corpus, macro-area, writing script, country, language family, language | corpus, macro-area, country                      |
| PAQ                  | words      | -0.041 (s.e. = 0.011; $p = 0.000$ )              | 46.03              | 100.00 | 98.85   |                                   |                                                                        | corpus, writing script, country, language family |
|                      | characters | -0.035 (s.e. = 0.006; $p = 0.000$ )              | 54.85              | 99.67  | 97.70   |                                   |                                                                        | corpus, macro-area, country, language family     |
| LSTM <sub>comp</sub> | words      | -0.054 (s.e. = 0.013; $p = 0.000$ )              | 55.64              | 100.00 | 100.00  |                                   |                                                                        | corpus, macro-area, country, language family     |
|                      | characters | -0.022 (s.e. = 0.007; $p = 0.001$ )              | 46.92              | 100.00 | 96.83   |                                   |                                                                        | corpus, macro-area, country, language family     |

**Supplementary Table 2 | Multilevel mixed-effects linear regression results (Study 1).** See Supplementary Table 1 for a description of the column content. Here, we include only documents from fully parallel corpora (N = 3,224). All estimated  $\beta_{\text{LMER}}$ -coefficients are significant at  $p < .05$ , except for LSTM<sub>comp</sub> as LM on the levels of characters, here  $p = .090$ .

| LM                   | Symbol     | $\beta_{\text{LMER}}$ (s.e., $p_{\text{para}}$ ) | $\Delta\text{AIC}$ | $M^+$  | $M_c^+$ | Selected controls              |                                                                        |                                                     |
|----------------------|------------|--------------------------------------------------|--------------------|--------|---------|--------------------------------|------------------------------------------------------------------------|-----------------------------------------------------|
|                      |            |                                                  |                    |        |         | Fixed effects                  | Random intercepts                                                      | Random slopes                                       |
| PPM                  | words      | -0.046 (s.e. = 0.022; p = 0.034)                 | 52.81              | 100.00 | 98.11   | $h, L$ , and their interaction | corpus, macro-area, writing script, country, language family, language | corpus, macro-area, country                         |
|                      | characters | -0.041 (s.e. = 0.013; p = 0.002)                 | 95.81              | 100.00 | 100.00  |                                |                                                                        | corpus, macro-area, country                         |
| PAQ                  | words      | -0.037 (s.e. = 0.010; p = 0.000)                 | 39.24              | 100.00 | 100.00  |                                |                                                                        | corpus, macro-area, writing script, language family |
|                      | characters | -0.029 (s.e. = 0.007; p = 0.000)                 | 53.42              | 100.00 | 100.00  |                                |                                                                        | corpus, country, language family                    |
| LSTM <sub>comp</sub> | words      | -0.050 (s.e. = 0.018; p = 0.005)                 | 46.18              | 100.00 | 100.00  |                                |                                                                        | corpus, macro-area, writing script                  |
|                      | characters | -0.019 (s.e. = 0.011; p = 0.090)                 | 83.50              | 99.84  | 95.84   |                                |                                                                        | corpus, macro-area, writing script, country         |

**Supplementary Table 3 | Double-selection lasso linear regression results (Study 1).** Column 1: Set of potential candidate variables to be included as controls in each model (Number of controls are given in brackets). Column 2: Language model. Column 3: Symbol type. Column 4: Number of cases. Column 5: Number of controls selected by lasso. Column 6,7: Out-of-sample  $R^2$  of learning difficulty (column 6)/speaker population size (column 7) on the control variables selected by the lasso. Column 8: Estimated coefficient for the effect of speaker population size,  $\beta_{DS}$ . Robust standard errors (clustered at the level of individual languages) and  $p$ -values are given in brackets. \* $p < 0.05$ , \*\* $p < 0.01$ , \*\*\* $p < 0.005$ . Statistical significance is determined based on non-parametric permutation tests (see Methods for further information on statistical methods).

| Candidate set          | LM       | Symbol     | $N$   | $N_s$ | $R^2_{outcome}$ | $R^2_{predictor}$ | $\beta_{DS}$ (s.e., $p_{perm}$ )        |
|------------------------|----------|------------|-------|-------|-----------------|-------------------|-----------------------------------------|
| small ( $N_c = 225$ )  | PPM      | words      | 3,585 | 143   | 94.06%          | 79.06%            | -0.004** (s.e. = 0.001, $p = 0.0076$ )  |
|                        |          | characters | 3,585 | 145   | 93.77%          | 79.16%            | -0.009*** (s.e. = 0.001, $p = 0.0000$ ) |
|                        | PAQ      | words      | 3,585 | 155   | 88.90%          | 78.93%            | -0.008*** (s.e. = 0.002, $p = 0.0002$ ) |
|                        |          | characters | 3,585 | 139   | 89.48%          | 78.91%            | -0.013*** (s.e. = 0.002, $p = 0.0000$ ) |
|                        | LSTMcomp | words      | 3,585 | 134   | 64.60%          | 78.66%            | -0.010*** (s.e. = 0.003, $p = 0.0012$ ) |
|                        |          | characters | 3,585 | 155   | 76.06%          | 78.67%            | -0.009*** (s.e. = 0.002, $p = 0.0000$ ) |
| medium ( $N_c = 274$ ) | PPM      | words      | 3,585 | 164   | 94.01%          | 79.56%            | -0.005*** (s.e. = 0.002, $p = 0.0034$ ) |
|                        |          | characters | 3,585 | 161   | 93.76%          | 79.68%            | -0.006*** (s.e. = 0.001, $p = 0.0000$ ) |
|                        | PAQ      | words      | 3,585 | 174   | 88.99%          | 79.46%            | -0.009*** (s.e. = 0.002, $p = 0.0000$ ) |
|                        |          | characters | 3,585 | 150   | 89.62%          | 79.46%            | -0.009*** (s.e. = 0.002, $p = 0.0000$ ) |
|                        | LSTMcomp | words      | 3,714 | 144   | 64.44%          | 79.33%            | -0.011*** (s.e. = 0.003, $p = 0.0010$ ) |
|                        |          | characters | 3,585 | 185   | 76.29%          | 79.33%            | -0.008*** (s.e. = 0.003, $p = 0.0036$ ) |
| big ( $N_c = 2,226$ )  | PPM      | words      | 3,585 | 538   | 94.47%          | 77.96%            | -0.002 (s.e. = 0.001, $p = 0.0722$ )    |
|                        |          | characters | 3,585 | 542   | 93.59%          | 78.29%            | -0.004*** (s.e. = 0.001, $p = 0.0020$ ) |
|                        | PAQ      | words      | 3,585 | 433   | 88.44%          | 78.06%            | -0.009*** (s.e. = 0.002, $p = 0.0006$ ) |
|                        |          | characters | 3,714 | 350   | 89.58%          | 78.07%            | -0.007*** (s.e. = 0.002, $p = 0.0000$ ) |
|                        | LSTMcomp | words      | 3,714 | 281   | 62.90%          | 77.95%            | -0.008* (s.e. = 0.003, $p = 0.0134$ )   |
|                        |          | characters | 3,714 | 482   | 74.54%          | 77.95%            | -0.007** (s.e. = 0.002, $p = 0.0076$ )  |

**Supplementary Table 4** | Double-selection lasso linear regression results (Study 1). See Supplementary Table 3 for details. Here, only fully parallel corpora are considered.

| Candidate set          | LM       | Symbol     | $N$   | $N_s$ | $R^2_{outcome}$ | $R^2_{predictor}$ | $\beta_{DS}$ (s.e., $p_{perm}$ )     |
|------------------------|----------|------------|-------|-------|-----------------|-------------------|--------------------------------------|
| small ( $N_c = 225$ )  | PPM      | words      | 3,008 | 146   | 95.10%          | 79.66%            | -0.005*** (s.e. = 0.001, p = 0.0014) |
|                        |          | characters | 3,008 | 140   | 95.23%          | 79.85%            | -0.007*** (s.e. = 0.001, p = 0.0000) |
|                        | PAQ      | words      | 3,008 | 138   | 90.72%          | 79.51%            | -0.008*** (s.e. = 0.002, p = 0.0006) |
|                        |          | characters | 3,008 | 143   | 91.88%          | 79.58%            | -0.009*** (s.e. = 0.002, p = 0.0000) |
|                        | LSTMcomp | words      | 3,008 | 145   | 60.33%          | 79.43%            | -0.008* (s.e. = 0.003, p = 0.0136)   |
|                        |          | characters | 3,008 | 144   | 76.61%          | 79.42%            | -0.009*** (s.e. = 0.002, p = 0.0002) |
| medium ( $N_c = 274$ ) | PPM      | words      | 3,008 | 152   | 94.94%          | 80.29%            | -0.005*** (s.e. = 0.001, p = 0.0008) |
|                        |          | characters | 3,008 | 144   | 95.15%          | 80.44%            | -0.006*** (s.e. = 0.001, p = 0.0000) |
|                        | PAQ      | words      | 3,008 | 165   | 90.78%          | 80.11%            | -0.008*** (s.e. = 0.002, p = 0.0006) |
|                        |          | characters | 3,008 | 166   | 91.91%          | 80.21%            | -0.006*** (s.e. = 0.002, p = 0.0008) |
|                        | LSTMcomp | words      | 3,008 | 116   | 51.83%          | 80.06%            | -0.010** (s.e. = 0.003, p = 0.0072)  |
|                        |          | characters | 3,008 | 174   | 77.36%          | 80.04%            | -0.007** (s.e. = 0.002, p = 0.0084)  |
| big ( $N_c = 2,226$ )  | PPM      | words      | 3,008 | 378   | 95.41%          | 77.62%            | -0.003* (s.e. = 0.001, p = 0.0214)   |
|                        |          | characters | 3,008 | 352   | 95.20%          | 78.15%            | -0.003* (s.e. = 0.001, p = 0.0214)   |
|                        | PAQ      | words      | 3,008 | 464   | 90.84%          | 77.94%            | -0.006* (s.e. = 0.002, p = 0.0102)   |
|                        |          | characters | 3,114 | 284   | 91.56%          | 77.98%            | -0.005*** (s.e. = 0.002, p = 0.0034) |
|                        | LSTMcomp | words      | 3,008 | 334   | 58.65%          | 77.51%            | -0.006 (s.e. = 0.003, p = 0.0718)    |
|                        |          | characters | 3,008 | 514   | 76.88%          | 77.69%            | -0.008*** (s.e. = 0.002, p = 0.0012) |

**Supplementary Table 5** | Cross-fit partialing-out lasso linear regression (Study 1). Column 1: Version ('all' or only fully 'parallel'). Column 2: Set of potential candidate variables to be included as controls in each model (Number of controls are given in brackets). Column 3: Language model. Column 4: Symbol type. Column 5: Number of controls selected by lasso. Column 6: Estimated coefficient for the effect of speaker population size,  $\beta_{XPO}$ . Robust standard errors clustered at the level of individual languages are given in brackets. \* $p < 0.05$ , \*\* $p < 0.01$ , \*\*\* $p < 0.005$ . Statistical significance is determined based on parametric tests. To select the optimal value for the penalty parameter for each lasso, we use a plugin iterative formula.

| Version                | Candidate set          | LM       | Symbol     | $N_s$ | $\beta_{XPO}$ (s.e., $p_{para}$ )      |
|------------------------|------------------------|----------|------------|-------|----------------------------------------|
| all ( $N=3,714$ )      | small ( $N_c = 225$ )  | PPM      | words      | 67    | -0.004*** (s.e. = 0.001, $p = 0.001$ ) |
|                        |                        |          | characters | 104   | -0.011*** (s.e. = 0.001, $p = 0.000$ ) |
|                        |                        | PAQ      | words      | 78    | -0.011*** (s.e. = 0.002, $p = 0.000$ ) |
|                        |                        |          | characters | 84    | -0.015*** (s.e. = 0.002, $p = 0.000$ ) |
|                        |                        | LSTMcomp | words      | 76    | -0.011*** (s.e. = 0.002, $p = 0.000$ ) |
|                        |                        |          | characters | 82    | -0.015*** (s.e. = 0.002, $p = 0.000$ ) |
|                        | medium ( $N_c = 274$ ) | PPM      | words      | 81    | -0.005*** (s.e. = 0.001, $p = 0.000$ ) |
|                        |                        |          | characters | 126   | -0.013*** (s.e. = 0.001, $p = 0.000$ ) |
|                        |                        | PAQ      | words      | 83    | -0.011*** (s.e. = 0.002, $p = 0.000$ ) |
|                        |                        |          | characters | 94    | -0.017*** (s.e. = 0.002, $p = 0.000$ ) |
|                        |                        | LSTMcomp | words      | 92    | -0.012*** (s.e. = 0.002, $p = 0.000$ ) |
|                        |                        |          | characters | 89    | -0.016*** (s.e. = 0.002, $p = 0.000$ ) |
|                        | big ( $N_c = 2,226$ )  | PPM      | words      | 663   | -0.004*** (s.e. = 0.001, $p = 0.001$ ) |
|                        |                        |          | characters | 731   | -0.011*** (s.e. = 0.001, $p = 0.000$ ) |
|                        |                        | PAQ      | words      | 576   | -0.008*** (s.e. = 0.002, $p = 0.000$ ) |
|                        |                        |          | characters | 567   | -0.014*** (s.e. = 0.002, $p = 0.000$ ) |
|                        |                        | LSTMcomp | words      | 648   | -0.015*** (s.e. = 0.002, $p = 0.000$ ) |
|                        |                        |          | characters | 678   | -0.011*** (s.e. = 0.002, $p = 0.000$ ) |
| parallel ( $N=3,114$ ) | small ( $N_c = 217$ )  | PPM      | words      | 65    | -0.007*** (s.e. = 0.001, $p = 0.000$ ) |
|                        |                        |          | characters | 100   | -0.012*** (s.e. = 0.001, $p = 0.000$ ) |
|                        |                        | PAQ      | words      | 81    | -0.012*** (s.e. = 0.002, $p = 0.000$ ) |
|                        |                        |          | characters | 82    | -0.012*** (s.e. = 0.002, $p = 0.000$ ) |
|                        |                        | LSTMcomp | words      | 71    | -0.013*** (s.e. = 0.002, $p = 0.000$ ) |

|  |                        |          |            |     |                                     |
|--|------------------------|----------|------------|-----|-------------------------------------|
|  | medium ( $N_c = 266$ ) | PPM      | characters | 79  | -0.015*** (s.e. = 0.002, p = 0.000) |
|  |                        |          | words      | 67  | -0.007*** (s.e. = 0.001, p = 0.000) |
|  |                        | PAQ      | characters | 111 | -0.012*** (s.e. = 0.001, p = 0.000) |
|  |                        |          | words      | 88  | -0.013*** (s.e. = 0.002, p = 0.000) |
|  |                        | LSTMcomp | characters | 93  | -0.012*** (s.e. = 0.002, p = 0.000) |
|  |                        |          | words      | 80  | -0.013*** (s.e. = 0.002, p = 0.000) |
|  |                        | LSTMcomp | characters | 81  | -0.016*** (s.e. = 0.002, p = 0.000) |
|  |                        |          | words      | 80  | -0.013*** (s.e. = 0.002, p = 0.000) |
|  | big ( $N_c = 1,912$ )  | PPM      | words      | 481 | -0.006*** (s.e. = 0.001, p = 0.000) |
|  |                        |          | characters | 527 | -0.009*** (s.e. = 0.001, p = 0.000) |
|  |                        | PAQ      | words      | 529 | -0.011*** (s.e. = 0.002, p = 0.000) |
|  |                        |          | characters | 484 | -0.012*** (s.e. = 0.002, p = 0.000) |
|  |                        | LSTMcomp | words      | 550 | -0.013*** (s.e. = 0.002, p = 0.000) |
|  |                        |          | characters | 518 | -0.012*** (s.e. = 0.002, p = 0.000) |

**Supplementary Table 6** | Bayesian Linear regression results. Column 1: Version ('all' or only fully 'parallel'). We first ran double-selection lasso linear regressions with the log of  $b$  as the outcome, the log of speaker population size as the covariate of interest and a set of potential controls that consists of the same variables as the small set described in the main part of the paper plus – since it is not possible to cluster variables at the level of individual languages for Bayesian models – indicator variables for the levels of language. The set consists of  $N_c = 1,505$  variables for the 'all' version and  $N_c = 1,457$  variable for the 'parallel' version. To select the optimal value for the penalty parameter for each lasso, we use a plugin iterative formula. Column 3: Language model. Column 4: Symbol type. Column 5: Number of controls selected by lasso. We then fitted Bayesian linear regressions with the log of  $b$  as the outcome and the log of speaker population size plus the selected controls as the covariates. We used a burn-in period of 100,000 iterations, normal priors with mean 0 and variance of 10,000 for the regression coefficients and an inverse-gamma prior with shape and scale parameters of 0.01 for the error variance. We used Gibbs sampling and simulated four chains for each model. Column 5: The Gelman–Rubin convergence diagnostic <sup>1,2</sup>,  $R_c$ , is given in parentheses for each model. All values are below 1.2 indicating convergence. Column 6: 95% credible interval for the estimated coefficient of speaker population sized. Column 7: Estimated posterior probability that the coefficient of speaker population size is negative (in %).

| Version                  | LM                   | Symbol     | $N_s$ | $R_c$ | CI <sub>95%</sub>    | Test    |
|--------------------------|----------------------|------------|-------|-------|----------------------|---------|
| all ( $N = 3,714$ )      | PPM                  | words      | 478   | 1.00  | [-0.00956, -0.00475] | 100.00% |
|                          |                      | characters | 394   | 1.01  | [-0.01704, -0.01269] | 100.00% |
|                          | PAQ                  | words      | 477   | 1.01  | [-0.01667, -0.00968] | 100.00% |
|                          |                      | characters | 487   | 1.04  | [-0.02147, -0.01439] | 100.00% |
|                          | LSTM <sub>comp</sub> | words      | 463   | 1.01  | [-0.01998, -0.01116] | 100.00% |
|                          |                      | characters | 460   | 1.04  | [-0.02584, -0.01663] | 100.00% |
| parallel ( $N = 3,114$ ) | PPM                  | words      | 397   | 1.01  | [-0.01025, -0.00494] | 100.00% |
|                          |                      | characters | 422   | 1.01  | [-0.01557, -0.01102] | 100.00% |
|                          | PAQ                  | words      | 405   | 1.03  | [-0.01726, -0.00947] | 100.00% |
|                          |                      | characters | 411   | 1.02  | [-0.01644, -0.01046] | 100.00% |
|                          | LSTM <sub>comp</sub> | words      | 406   | 1.02  | [-0.02610, -0.01603] | 100.00% |
|                          |                      | characters | 404   | 1.14  | [-0.02436, -0.01520] | 100.00% |

**Supplementary Table 7** | Multilevel mixed-effects linear regression results (Study 2). Column 1: Language model. Column 2: Symbol type. The table shows random effects/slopes structure for the selected models listed in **Table 4** in the main part of the paper. Columns 3-8: Results for the NT version ( $N = 504$ ). Columns 9-14: Results for the OT version ( $N = 138$ ). Columns 3,9: Estimated fixed effect of speaker population size,  $\beta_{LMER}$ . Listed are models with the lowest AIC per LM and per symbol from a total of 728 models that include a fixed effect (and potential random slopes) for speaker population size. Standard errors are given in brackets. Columns 4,10: Difference-in-AIC between reduced and full models. Columns 5,11: Percentage of cases where the full model has a better fit (i.e. lower AIC) than the corresponding reduced model (here models that do not include a fixed effect for speaker population size but potential random slopes for speaker population size are excluded). Columns 6,12: Percentage of cases where the full model has a better fit than the corresponding reduced model (here models, where  $\beta_{LMER}$  is constrained to be zero, are included). Column 7,8: Random effects/slopes structure for the NT version. Column 13,14: Random effects/slopes structure for the OT version.

\* $p < 0.05$ , \*\*  $p < 0.01$ , \*\*\*  $p < 0.005$ . Statistical significance is determined based on parametric tests. See Methods for further information on statistical methods.

|      |        | Version: NT ( $N = 504$ ) |              |        |         |                                                                     |                                              | Version: OT ( $N = 138$ ) |              |        |         |                                                                           |                                                                |
|------|--------|---------------------------|--------------|--------|---------|---------------------------------------------------------------------|----------------------------------------------|---------------------------|--------------|--------|---------|---------------------------------------------------------------------------|----------------------------------------------------------------|
| LM   | Symbol | $\beta_{LMER}$ (s.e.)     | $\Delta AIC$ | $M^+$  | $M_c^+$ | Intercepts                                                          | Slopes                                       | $\beta_{LMER}$ (s.e.)     | $\Delta AIC$ | $M^+$  | $M_c^+$ | Intercepts                                                                | Slopes                                                         |
| PPM2 | words  | -0.0022***<br>(0.0006)    | 16.23        | 100.00 | 100.00  | script, country,<br>macrofamily, subfamily,<br>subbranch            | script, macrofamily, subfamily               | -0.0031***<br>(0.0010)    | 11.07        | 100.00 | 100.00  | macroarea, country,<br>macrofamily,<br>subfamily,<br>subbranch            | country,<br>macrofamily,<br>subfamily                          |
|      | BPE    | -0.0007***<br>(0.0002)    | 13.94        | 100.00 | 100.00  | script, macroarea,<br>country, macrofamily,<br>subfamily, subbranch | script, country, macrofamily,<br>subfamily   | -0.0009***<br>(0.0002)    | 8.41         | 100.00 | 100.00  | script, macroarea,<br>country,<br>macrofamily,<br>subbranch               | macrofamily,<br>subbranch                                      |
| PPM6 | words  | -0.0022***<br>(0.0005)    | 12.85        | 100.00 | 100.00  | script, country,<br>macrofamily, subfamily,<br>subbranch            | script                                       | -0.0032***<br>(0.0010)    | 8.52         | 100.00 | 100.00  | script, macroarea,<br>country,<br>macrofamily,<br>subfamily,<br>subbranch | script,<br>macroarea,<br>macrofamily,<br>subfamily             |
|      | BPE    | -0.0015***<br>(0.0003)    | 21.47        | 100.00 | 100.00  | script, country,<br>macrofamily, subfamily,<br>subbranch            | script, macrofamily, subfamily               | -0.0019***<br>(0.0004)    | 13.29        | 100.00 | 100.00  | macroarea, country,<br>macrofamily,<br>subfamily,<br>subbranch            | country,<br>subfamily,<br>subbranch                            |
| LZMA | words  | -0.0021***<br>(0.0005)    | 16.00        | 100.00 | 100.00  | script, macroarea,<br>country, macrofamily,<br>subfamily, subbranch | script, macrofamily                          | -0.0028***<br>(0.0008)    | 10.90        | 100.00 | 100.00  | script, macroarea,<br>country,<br>macrofamily,<br>subfamily,<br>subbranch | script,<br>country,<br>macrofamily,<br>subfamily,<br>subbranch |
|      | BPE    | -0.0011***<br>(0.0003)    | 10.92        | 100.00 | 100.00  | script, macroarea,<br>country, macrofamily,<br>subfamily, subbranch | script, macroarea, macrofamily,<br>subfamily | -0.0013***<br>(0.0003)    | 16.13        | 100.00 | 100.00  | macroarea, country,<br>macrofamily,<br>subbranch                          | macroarea,<br>subbranch                                        |
| PAQ  | words  | -0.0016***<br>(0.0005)    | 11.02        | 100.00 | 100.00  | script, country,<br>macrofamily, subfamily,<br>subbranch            | script, macrofamily                          | -0.0024***<br>(0.0006)    | 10.17        | 100.00 | 100.00  | macroarea, country,<br>macrofamily,<br>subfamily,<br>subbranch            | macrofamily,<br>subfamily,<br>subbranch                        |

|               |       |                        |       |        |        |                                                                     |                                                 |                        |       |        |        |                                                                |                                      |
|---------------|-------|------------------------|-------|--------|--------|---------------------------------------------------------------------|-------------------------------------------------|------------------------|-------|--------|--------|----------------------------------------------------------------|--------------------------------------|
|               | BPE   | -0.0009**<br>(0.0003)  | 8.01  | 100.00 | 100.00 | script, macroarea,<br>country, macrofamily,<br>subfamily, subbranch | script, macroarea, macrofamily                  | -0.0010***<br>(0.0004) | 11.63 | 100.00 | 100.00 | macroarea, country,<br>macrofamily,<br>subbranch               | macroarea,<br>country,<br>subbranch  |
| LSTM<br>comp  | words | -0.0008***<br>(0.0003) | 8.20  | 100.00 | 100.00 | script, country,<br>macrofamily, subfamily,<br>subbranch            | script, macrofamily                             | -0.0020***<br>(0.0005) | 13.17 | 100.00 | 100.00 | macroarea, country,<br>macrofamily,<br>subfamily,<br>subbranch | macrofamily,<br>subfamily            |
|               | BPE   | -0.0012***<br>(0.0002) | 18.89 | 100.00 | 100.00 | script, macroarea,<br>country, macrofamily,<br>subfamily, subbranch | script, macrofamily, subfamily,<br>subbranch    | -0.0015***<br>(0.0003) | 13.35 | 100.00 | 100.00 | script, macroarea,<br>country,<br>macrofamily,<br>subfamily    | script,<br>macroarea,<br>macrofamily |
| NNCP<br>small | words | 0.0001 (0.0002)        | 0.19  | 33.10  | 50.00  | script, macroarea,<br>country, subfamily,<br>subbranch              | script, subfamily, subbranch                    | -0.0013***<br>(0.0004) | 6.79  | 100.00 | 100.00 | script, country,<br>macrofamily,<br>subfamily,<br>subbranch    | script,<br>subfamily,<br>subbranch   |
|               | BPE   | -0.0001 (0.0003)       | -0.67 | 9.75   | 50.14  | script, macroarea,<br>country, macrofamily,<br>subfamily, subbranch | macroarea, macrofamily, subfamily               | -0.0016***<br>(0.0003) | 17.00 | 100.00 | 100.00 | country, subfamily,<br>subbranch                               |                                      |
| NNCP<br>large | words | -0.0005 (0.0003)       | 1.44  | 97.94  | 92.45  | script, macroarea,<br>country, macrofamily,<br>subfamily, subbranch | script, macroarea, macrofamily,<br>subfamily    | -0.0015***<br>(0.0004) | 7.99  | 100.00 | 100.00 | macroarea, country,<br>macrofamily,<br>subfamily,<br>subbranch | subfamily,<br>subbranch              |
|               | BPE   | -0.0007***<br>(0.0002) | 5.01  | 100.00 | 100.00 | script, macroarea,<br>country, macrofamily,<br>subfamily, subbranch | macroarea, macrofamily, subfamily,<br>subbranch | -0.0017***<br>(0.0004) | 13.43 | 100.00 | 100.00 | country, subfamily                                             |                                      |

**Supplementary Table 8** | Cross-fit partialing-out lasso linear regression (Study 2). As potential control variables, we include the number of countries in which the language is spoken, third-order B-spline basis functions for both longitude and latitude each with three knots placed at the 25th, the 50th and the 75th percentiles (see Methods for details) and a set of indicator variables for the levels of writing script, macro-area, language family, language subfamily, sub-branch and EGIDS level ( $N_c = 417$  for NT and  $N_c = 218$  for OT). Column 1: Language model. Column 2: Symbol type. Columns 3,4: Results for the NT version. Column 3: Estimated coefficient for the effect of speaker population size,  $\beta_{XPO}$ . Robust standard errors are given in brackets. Column 4: Number of selected controls. Columns 5,6: Analogous results for the OT version. \* $p < 0.05$ , \*\* $p < 0.01$ , \*\*\* $p < 0.005$ . Statistical significance is determined based on parametric tests. To select the optimal value for the penalty parameter for each lasso, we use a plugin iterative formula.

|           |        | Version: NT ( $N = 504$ ) |       | Version: OT ( $N = 138$ ) |       |
|-----------|--------|---------------------------|-------|---------------------------|-------|
| LM        | Symbol | $\beta_{XPO}$ (s.e.)      | $N_s$ | $\beta_{XPO}$ (s.e.)      | $N_s$ |
| PPM2      | words  | -0.0023*** (0.0007)       | 117   | -0.0041*** (0.0012)       | 40    |
|           | BPE    | -0.0006** (0.0002)        | 103   | -0.0008* (0.0003)         | 49    |
| PPM6      | words  | -0.0019*** (0.0006)       | 116   | -0.0047*** (0.0011)       | 46    |
|           | BPE    | -0.0013*** (0.0004)       | 108   | -0.0028*** (0.0006)       | 51    |
| LZMA      | words  | -0.0016** (0.0006)        | 122   | -0.0035*** (0.0009)       | 46    |
|           | BPE    | -0.0005 (0.0005)          | 100   | -0.0017*** (0.0005)       | 48    |
| PAQ       | words  | -0.0012* (0.0005)         | 124   | -0.0033*** (0.0007)       | 48    |
|           | BPE    | -0.0002 (0.0006)          | 104   | -0.0018*** (0.0005)       | 46    |
| LSTM      | words  | -0.0007* (0.0003)         | 94    | -0.0025*** (0.0005)       | 52    |
|           | BPE    | -0.0012*** (0.0003)       | 97    | -0.0019*** (0.0005)       | 53    |
| NNCPsmall | words  | -0.0000 (0.0003)          | 100   | -0.0011* (0.0005)         | 43    |
|           | BPE    | 0.0019 (0.0019)           | 110   | -0.0016*** (0.0004)       | 41    |
| NNCPlarge | words  | -0.0003 (0.0003)          | 103   | -0.0019*** (0.0006)       | 54    |
|           | BPE    | -0.0007* (0.0003)         | 99    | -0.0016*** (0.0005)       | 39    |

**Supplementary Table 9 | Phylogenetic generalized least squares regression results (Study 2).** Column 1: Language model. Column 2: Symbol type. Columns 3-5: Results for the NT version ( $N = 504$ ). Columns 6-8: Results for the OT version ( $N = 138$ ). Columns 3,6: Estimated effect of speaker population size,  $\beta_{PGLS}$ . Standard errors are given in brackets. Columns 4,7: Difference-in-AIC between reduced and full models,  $\Delta AIC_r - AIC$ . Columns 5,8: Coefficient of determination,  $R^2$  (in %). \* $p < 0.05$ , \*\* $p < 0.01$ , \*\*\* $p < 0.005$ . Statistical significance is determined based on parametric tests. See Methods for further information on statistical methods.

|                       |        | Version: NT ( $N = 504$ ) |              |       | Version: OT ( $N = 138$ ) |              |       |
|-----------------------|--------|---------------------------|--------------|-------|---------------------------|--------------|-------|
| LM                    | Symbol | $\beta_{PGLS}$ (s.e.)     | $\Delta AIC$ | $R^2$ | $\beta_{PGLS}$ (s.e.)     | $\Delta AIC$ | $R^2$ |
| PPM2                  | words  | -0.0028*** (0.0005)       | 30.16        | 6.18  | -0.0050*** (0.0010)       | 21.21        | 15.48 |
|                       | BPE    | -0.0007*** (0.0001)       | 20.62        | 4.39  | -0.0013*** (0.0002)       | 25.72        | 18.20 |
| PPM6                  | words  | -0.0026*** (0.0004)       | 40.28        | 8.05  | -0.0061*** (0.0010)       | 30.66        | 21.08 |
|                       | BPE    | -0.0018*** (0.0002)       | 83.37        | 15.58 | -0.0034*** (0.0004)       | 59.47        | 35.94 |
| LZMA                  | words  | -0.0025*** (0.0004)       | 41.27        | 8.23  | -0.0051*** (0.0008)       | 33.75        | 22.82 |
|                       | BPE    | -0.0015*** (0.0002)       | 52.31        | 10.22 | -0.0027*** (0.0003)       | 52.22        | 32.49 |
| PAQ                   | words  | -0.0020*** (0.0003)       | 36.88        | 7.42  | -0.0045*** (0.0007)       | 38.31        | 25.33 |
|                       | BPE    | -0.0013*** (0.0002)       | 43.40        | 8.61  | -0.0027*** (0.0003)       | 49.78        | 31.29 |
| LSTM <sub>comp</sub>  | words  | -0.0011*** (0.0002)       | 32.64        | 6.64  | -0.0032*** (0.0005)       | 36.95        | 24.59 |
|                       | BPE    | -0.0011*** (0.0002)       | 38.73        | 7.76  | -0.0021*** (0.0003)       | 36.47        | 24.33 |
| NNCP <sub>small</sub> | words  | -0.0000 (0.0002)          | -1.97        | 0.01  | -0.0017*** (0.0004)       | 15.23        | 11.74 |
|                       | BPE    | -0.0002 (0.0002)          | -0.65        | 0.27  | -0.0017*** (0.0003)       | 30.84        | 21.18 |
| NNCP <sub>large</sub> | words  | -0.0006*** (0.0002)       | 8.16         | 2.00  | -0.0026*** (0.0005)       | 27.00        | 18.96 |
|                       | BPE    | -0.0008*** (0.0002)       | 13.90        | 3.10  | -0.0020*** (0.0004)       | 26.21        | 18.49 |

**Supplementary Table 10 | Spatial autoregressive error regression results (Study 2).** Column 1: Language model. Column 2: Symbol type. Column 3,4: Results for the NT version ( $N = 414$ ). Column 5,6: Results for the OT version ( $N = 126$ ). Column 3,5: Estimated effect of speaker population size,  $\beta_{SAR}$ . Standard errors that are treated as heteroskedastic are given in brackets. Column 4,6: Coefficient of determination,  $R^2$  (in %). Each model contains autoregressive error terms for phylogenetic relatedness and geographical proximity simultaneously estimated by two inverse-distance matrices. \* $p < 0.05$ , \*\* $p < 0.01$ , \*\*\* $p < 0.005$ . Statistical significance is determined based on non-parametric permutation tests. Note that since models are based on a GS2SLS, the computation of AIC values is not appropriate, because estimation is not based on (log) likelihood maximization. See Methods for further information.

|                       |        | Version: NT ( $N = 414$ ) |       | Version: OT ( $N = 126$ ) |       |
|-----------------------|--------|---------------------------|-------|---------------------------|-------|
| LM                    | Symbol | $\beta_{SAR}$ (s.e.)      | $R^2$ | $\beta_{SAR}$ (s.e.)      | $R^2$ |
| PPM2                  | words  | -0.0021*** (0.0005)       | 5.95  | -0.0037*** (0.0011)       | 10.84 |
|                       | BPE    | -0.0008*** (0.0002)       | 5.19  | -0.0008* (0.0003)         | 14.32 |
| PPM6                  | words  | -0.0019*** (0.0004)       | 8.78  | -0.0036*** (0.0011)       | 16.69 |
|                       | BPE    | -0.0020*** (0.0003)       | 18.01 | -0.0029*** (0.0005)       | 31.03 |
| LZMA                  | words  | -0.0020*** (0.0004)       | 9.21  | -0.0027*** (0.0008)       | 17.15 |
|                       | BPE    | -0.0017*** (0.0002)       | 13.65 | -0.0019*** (0.0004)       | 27.40 |
| PAQ                   | words  | -0.0015*** (0.0003)       | 8.83  | -0.0025*** (0.0007)       | 19.74 |
|                       | BPE    | -0.0016*** (0.0002)       | 11.66 | -0.0021*** (0.0004)       | 25.58 |
| LSTM <sub>comp</sub>  | words  | -0.0008*** (0.0002)       | 7.24  | -0.0022*** (0.0005)       | 20.38 |
|                       | BPE    | -0.0008*** (0.0002)       | 8.50  | -0.0016*** (0.0004)       | 18.89 |
| NNCP <sub>small</sub> | words  | 0.0001 (0.0002)           | -0.00 | -0.0014** (0.0005)        | 8.63  |
|                       | BPE    | -0.0004 (0.0002)          | 0.67  | -0.0014*** (0.0004)       | 16.88 |
| NNCP <sub>large</sub> | words  | -0.0007** (0.0002)        | 2.56  | -0.0015** (0.0005)        | 14.35 |
|                       | BPE    | -0.0010*** (0.0002)       | 3.91  | -0.0016* (0.0005)         | 13.77 |

## References

1. Gelman, A. & Rubin, D. B. Inference from Iterative Simulation Using Multiple Sequences. *Stat. Sci.* **7**, (1992).
2. Brooks, S. P. & Gelman, A. General Methods for Monitoring Convergence of Iterative Simulations. *J. Comput. Graph. Stat.* **7**, 434–455 (1998).
